# Supplementary material for: Restoration of Autophagic Flux Rescues Oxidative Damage and Mitochondrial Dysfunction to Protect against Intervertebral Disc Degeneration
Source: Hindawi journal article supplement (doi:10.1155/2019/7810320), 2019-12-30

# Graphical Abstract

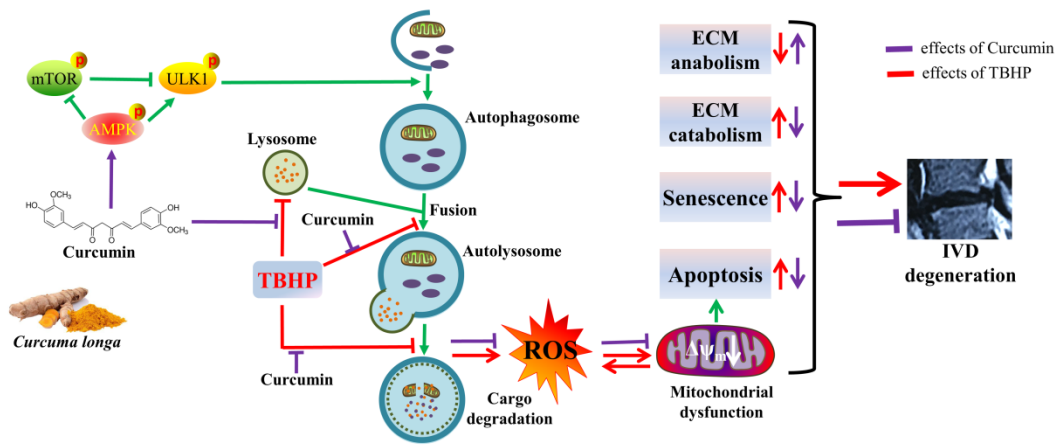

Supplement: f1 [file 7810320.f1.pdf]
